# Supplementary material
Source: ML conference proceedings conference paper supplement (https://openaccess.thecvf.com/content/CVPR2021/html/Kim_LaPred_Lane-Aware_Prediction_CVPR_2021_paper.html)
Supplement: Supplementary file 1 [file Kim_LaPred_Lane-Aware_Prediction_CVPR_2021_supplemental.pdf]

# Supplementary Material

In this supplementary material, we present the implementation details of the proposed LaPred method.

## 1. System Setup and Training Details

- Time steps of past trajectory
  - nuScenes dataset:  $\tau = 4$  (2 seconds)
  - Argoverse dataset:  $\tau = 20$  (2 seconds)
- Time steps of future trajectory
  - nuScenes dataset:  $h = 12$  (6 seconds)
  - Argoverse dataset:  $h = 30$  (3 seconds)
- Number of lane candidates:  $N = 6$
- Setting for lane candidates
  - nuScenes dataset
    - \* Length of lane candidate: 130m (Forward: 100m, Backward: 30m)
    - \* Distance between adjacent coordinate points: 0.5m
    - \* Total number of the coordinate points for each lane candidate:  $M = 260$
  - Argoverse dataset
    - \* Length of lane candidate: 80m (Forward: 50m, Backward: 30m)
    - \* Distance between adjacent coordinate points: 1.0m
    - \* Total number of the coordinate points for each lane candidate:  $M = 80$
- Adam optimizer with initial learning rate 0.0003
- Learning rate decay: Reduced by half when the validation loss is plateaued for more than three epochs
- Batch size:  $B = 32$
- Loss parameters:  $\alpha = 0.3$  and  $\beta = 0.7$

## 2. Network Architecture

Table 1 to 3 present the detailed network architectures of the TFE block, LA block, and MTP block, respectively.

| Input         | $V^{(P)}$     |                                 | $L^i$         |                        | $V^i$           |                                 |
|---------------|---------------|---------------------------------|---------------|------------------------|-----------------|---------------------------------|
| 1D CNN        | Input size    | $B \times \tau \times 2$        | Input size    | $B \times M \times 2$  | Input size      | $B \times \tau \times 2$        |
|               | Specification | $u64 - k2 - s1 - p0$            | Specification | $u64 - k3 - s1 - p1$   | Specification   | $u64 - k2 - s1 - p0$            |
|               | Output size   | $B \times (\tau - 1) \times 64$ | Output size   | $B \times M \times 64$ | Output size     | $B \times (\tau - 1) \times 64$ |
|               | Input size    | $B \times (\tau - 1) \times 64$ | Input size    | $B \times M \times 64$ | Input size      | $B \times (\tau - 1) \times 64$ |
|               | Specification | $u64 - k2 - s1 - p0$            | Specification | $u64 - k3 - s1 - p1$   | Specification   | $u64 - k2 - s1 - p0$            |
|               | Output size   | $B \times (\tau - 2) \times 64$ | Output size   | $B \times M \times 64$ | Output size     | $B \times (\tau - 2) \times 64$ |
| LSTM          | Input size    | $B \times (\tau - 2) \times 64$ | Input size    | $B \times M \times 96$ | Input size      | $B \times (\tau - 2) \times 64$ |
|               | Specification | $u512$                          | Specification | $u2048$                | Specification   | $u512$                          |
|               | Output size   | $B \times 512$                  | Output size   | $B \times 2048$        | Output size     | $B \times 512$                  |
| Output        | $\xi_{V_p}$   |                                 | $\xi_{L^i}$   |                        | $\xi_{V^i}$     |                                 |
| Concatenation |               |                                 |               |                        |                 |                                 |
| FC            | Input size    |                                 |               |                        | $B \times 3072$ |                                 |
|               | Specification |                                 |               |                        | $u2048$         |                                 |
|               | Output size   |                                 |               |                        | $B \times 2048$ |                                 |
|               | Input size    |                                 |               |                        | $B \times 2048$ |                                 |
| FC            | Specification |                                 |               |                        | $u2048$         |                                 |
|               | Output size   |                                 |               |                        | $B \times 2048$ |                                 |
|               | Input size    |                                 |               |                        | $B \times 2048$ |                                 |
| FC            | Specification |                                 |               |                        | $u1024$         |                                 |
|               | Output size   |                                 |               |                        | $B \times 1024$ |                                 |
|               | Input size    |                                 |               |                        | $B \times 1024$ |                                 |
| FC            | Specification |                                 |               |                        | $u1024$         |                                 |
|               | Output size   |                                 |               |                        | $B \times 1024$ |                                 |
|               | Input size    |                                 |               |                        | $B \times 1024$ |                                 |
| Output        | $\xi^i$       |                                 |               |                        |                 |                                 |

Table 1: Detailed network architecture of TFE block.  $ux - ky - sz - pw$  represents a layer with the number of unit  $x$ , kernel size  $y$ , stride  $z$ , and padding on all side  $w$ .

| Input         | $\xi^{1:N}$    |                            |
|---------------|----------------|----------------------------|
|               | Concatenation  |                            |
| FC            | Input size     | $B \times (1024 \times N)$ |
|               | Specification  | $u512$                     |
|               | Output size    | $B \times 512$             |
|               | Input size     | $B \times 512$             |
|               | Specification  | $u512$                     |
|               | Output size    | $B \times 512$             |
|               | Input size     | $B \times 512$             |
|               | Specification  | $u256$                     |
|               | Output size    | $B \times 256$             |
|               | Input size     | $B \times 256$             |
| Specification | $u256$         |                            |
| Output size   | $B \times 256$ |                            |
| Input size    | $B \times 256$ |                            |
| Specification | $u64$          |                            |
| Output size   | $B \times 64$  |                            |
| Input size    | $B \times 64$  |                            |
| Specification | $u64$          |                            |
| Output size   | $B \times 64$  |                            |
| Input size    | $B \times 64$  |                            |
| Specification | $u(N)$         |                            |
| Output size   | $B \times N$   |                            |
|               | Softmax        |                            |

Table 2: Detailed network architecture of LA block.

| Input     | $\xi$             | $\xi_{V_p}$             |
|-----------|-------------------|-------------------------|
|           | Concatenation     |                         |
| FC( $k$ ) | Input size        | $B \times 1536$         |
|           | Specification     | $u512$                  |
|           | Output size       | $B \times 512$          |
|           | Input size        | $B \times 512$          |
|           | Specification     | $u512$                  |
|           | Output size       | $B \times 512$          |
| Shared FC | Input size        | $B \times 512$          |
|           | Specification     | $u256$                  |
|           | Output size       | $B \times 256$          |
|           | Input size        | $B \times 256$          |
| Shared FC | Specification     | $u256$                  |
|           | Output size       | $B \times 256$          |
|           | Input size        | $B \times 256$          |
| Shared FC | Specification     | $u(h \times 2)$         |
|           | Output size       | $B \times (h \times 2)$ |
| Output    | $\hat{V}^{(f,k)}$ |                         |

Table 3: Detailed network architecture of MTP block.

### 3. Single-agent vs. Multi-agent features for employing nearby agents.

Table 4 presents the comparison of the prediction performance among different methods to employ nearby agents in the TFE block. Specifically, we compare our proposed method  $LaPred_{SL}$ , which considers a single agent per lane, against two different methods  $LaPred_{ML}$  and  $LaPred_M$ , which aggregate multiple nearby agents per lane by using max-pooling. In  $LaPred_{ML}$ , the closest lane to each agent is identified then the agent features that share the same closest lane are aggregated to their corresponding closest lane. On the other hand,  $LaPred_M$  aggregates every agent feature to all lanes regardless of their distances to lanes.

| Method        | $ADE_5$ | $FDE_5$ | $ADE_{10}$ | $FDE_{10}$ |
|---------------|---------|---------|------------|------------|
| $LaPred_{SL}$ | 1.53    | 3.37    | 1.21       | 2.61       |
| $LaPred_{ML}$ | 1.56    | 3.42    | 1.22       | 2.63       |
| $LaPred_M$    | 1.60    | 3.56    | 1.25       | 2.68       |

Table 4: Performance of different methods to aggregate nearby agents evaluated on nuScenes validation set.
